# Supplementary material for: Causal factors for seismicity near Azle, Texas
Source: PubMed Central journal article supplement (PMC4410634; doi:10.1038/ncomms7728), 2015-04-21
Supplement: ncomms7728-s1.pdf [file ncomms7728-s1.pdf]

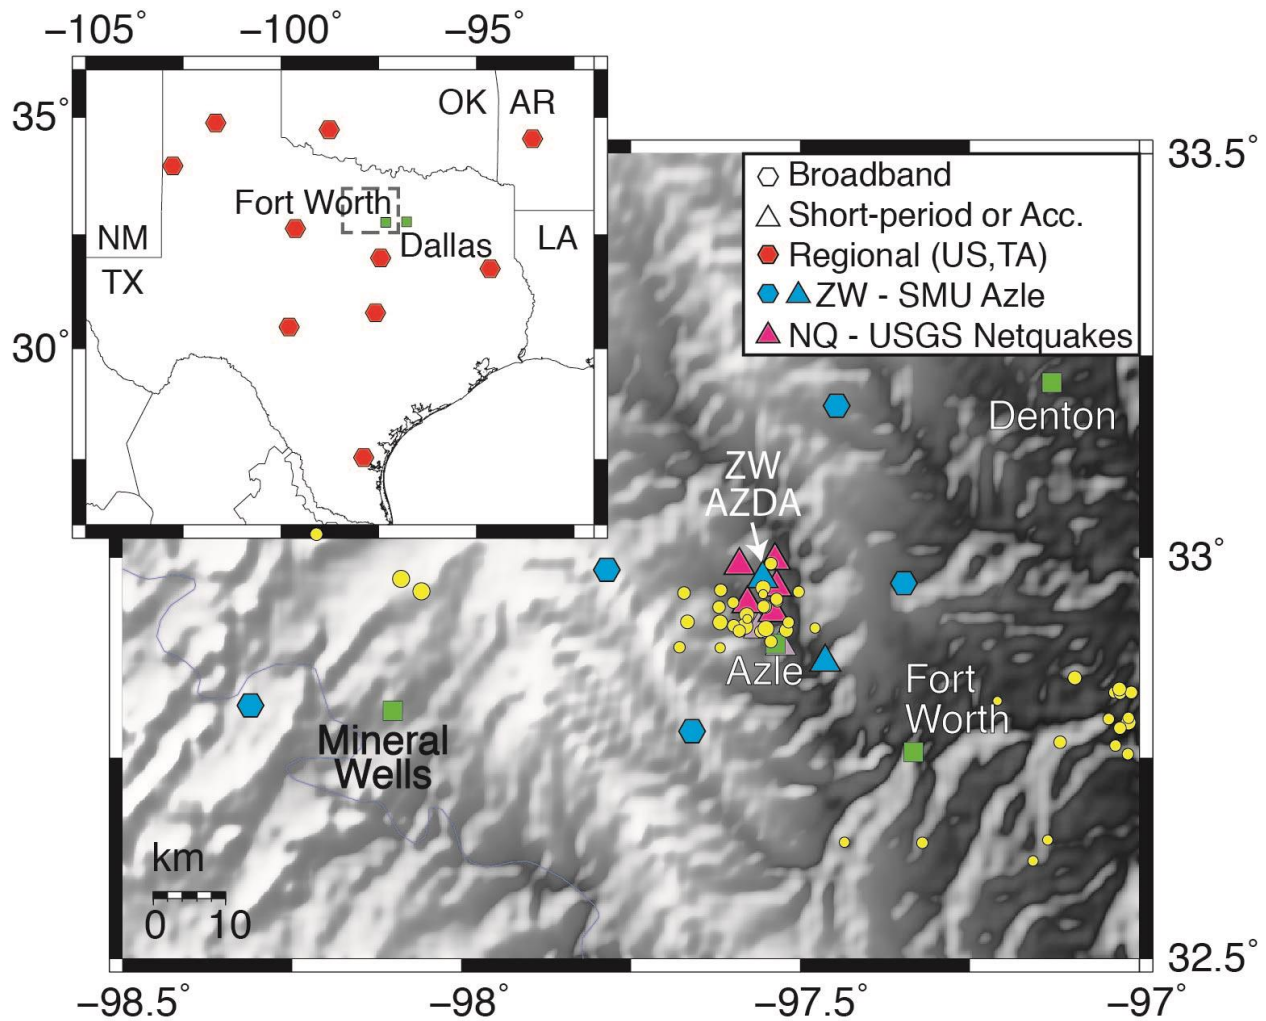

**Supplementary Figure 1.** USGS NEIC catalogue locations 2008-present (yellow circles) and seismograph stations for North Texas. The Azle earthquake sequence consists of the 27 felt events located to the north and west of Azle, TX (shown here) and seismicity recorded by the temporary network (see Figure 1). Additionally, two M3.7 earthquakes near Mineral Wells occurred in November 2013. NEIC locations are determined using the regional broadband stations (red hexagons) shown in the inset. The temporary Azle network (ZW and 5 NQ stations) was deployed starting on 15 December 2013 and completed to 12 stations by mid-January 2014.

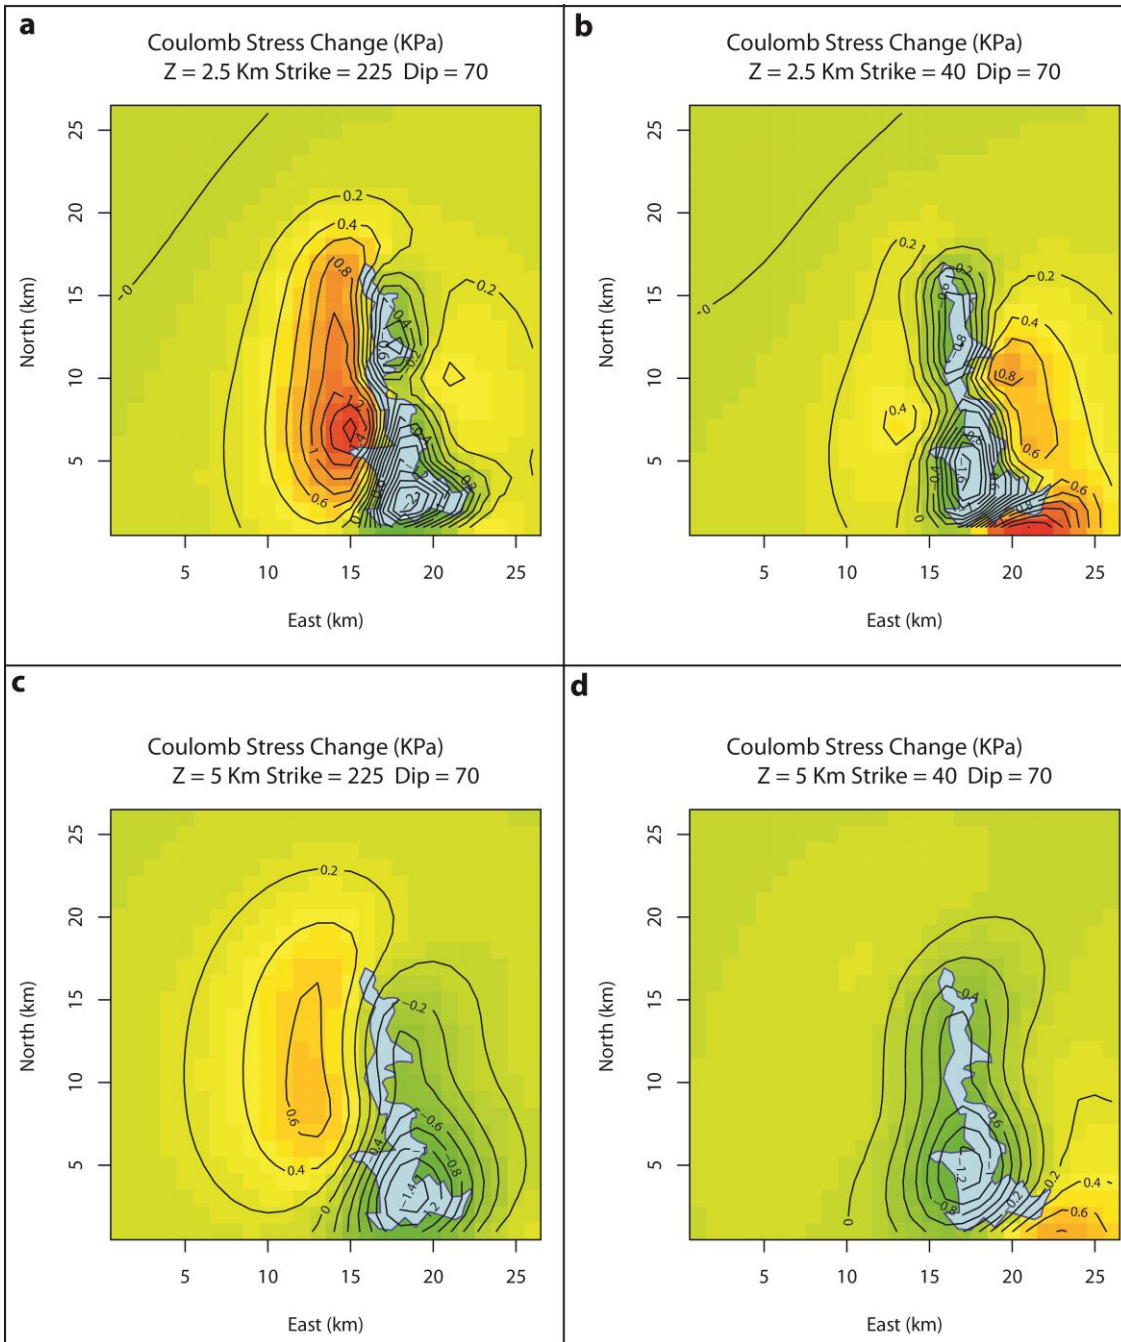

**Supplementary Figure 2.** Change in Coulomb stress at 2.5 km (**a**, **b**) and 5 km (**c**, **d**) depth for normal faulting caused by the 2.1 m drop in water level in Eagle Mountain Lake between April 2012 and November 2013, computed using the Boussinesq solution for a change in surface load on an elastic half-space<sup>37</sup>. Warm colours indicate increased failure potential; cool colours indicate decreased failure potential. **a** and **c** correspond to orientation of the main fault defined by earthquake hypocentres. **b** and **d** correspond to antithetic normal fault orientation.

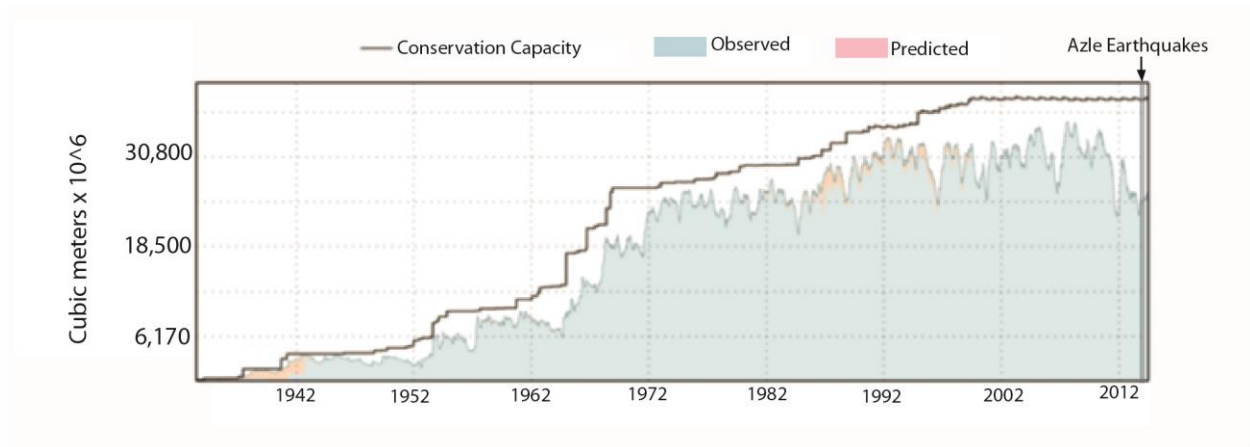

**Supplementary Figure 3.** Water volume stored in Eagle Mountain Lake since dam construction in 1932 (<http://www.waterdatafortexas.org/reservoirs/statewide>). During the period of earthquake activity, lake volumes have not been at record high or record low values.



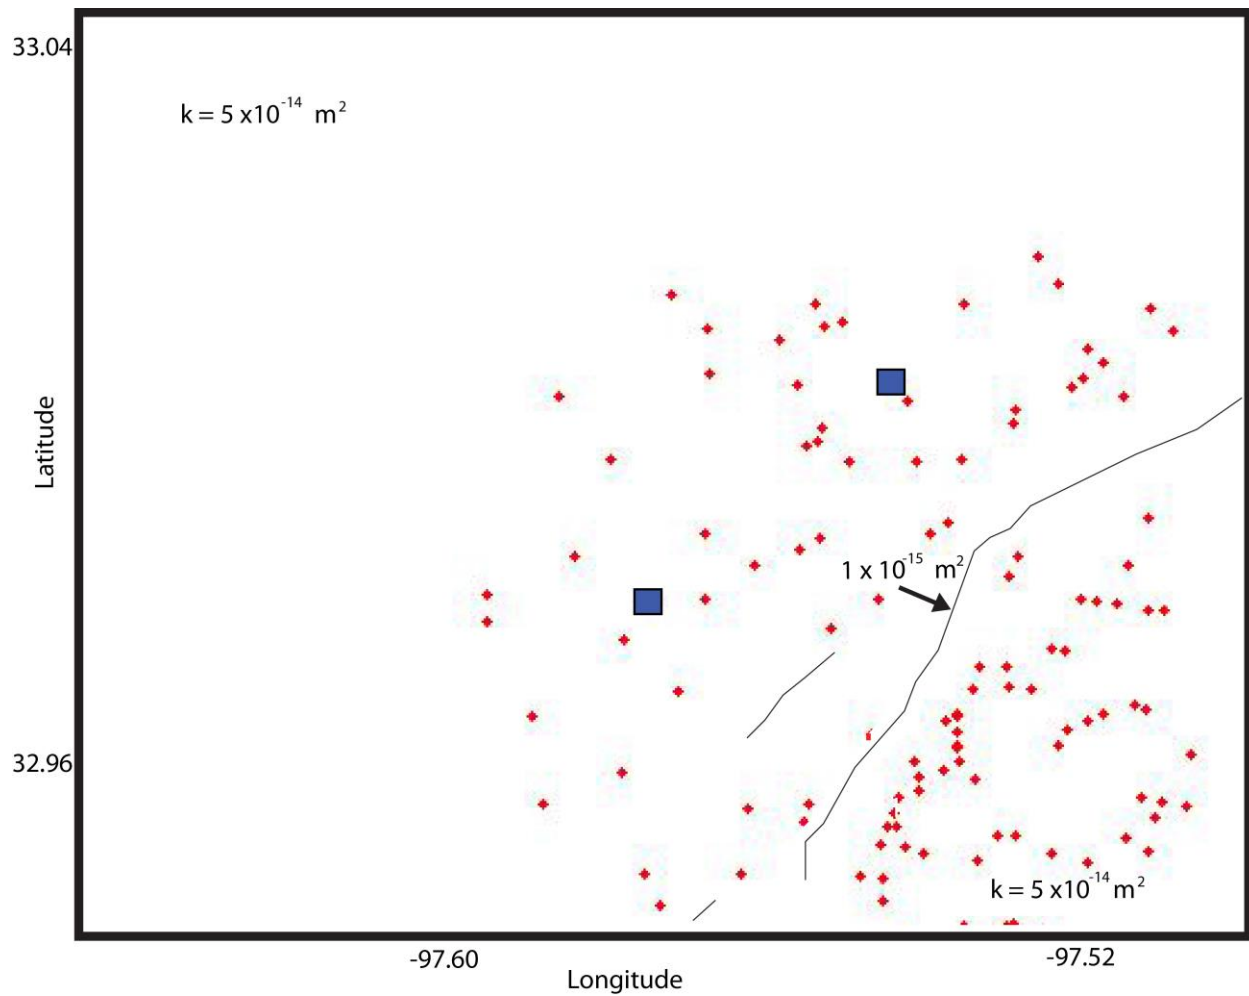

**Supplementary Figure 5.** Map view of model space at a depth of 2500 m showing the location of the two injector wells (blue), the 70 largest brine producer wells in the region (red), and an example of assigned mean effective permeability values for the Ellenburger formation versus fault permeability for an example model run. Black lines indicate the fault location at the top of the Ellenburger formation.

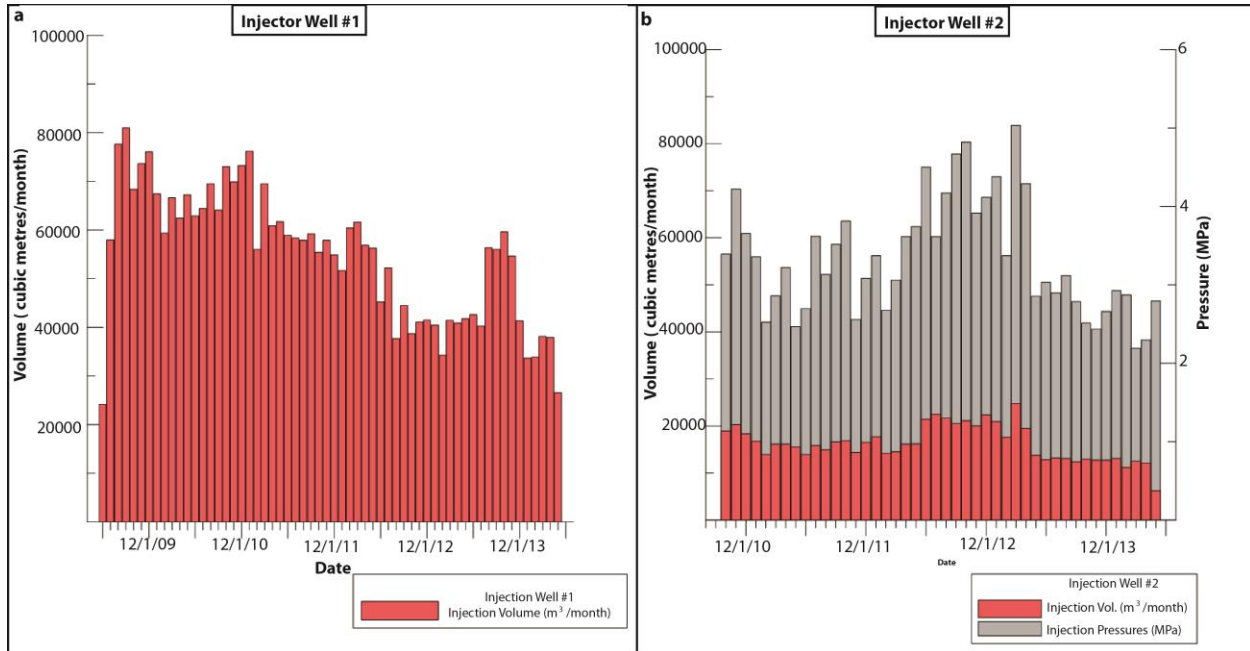

**Supplementary Figure 6.** Monthly Injection volumes up to September, 2013 for Injector Well #1 (a) and Injector Well #2 (b) based on TRC public data. See also Supplementary Tables 3 and 4. Grey bars indicate the average monthly wellhead pressure reported for Injector Well #2. Note that average pressure values generally increase and decrease with increasing and decreasing injection volumes. Nonetheless, during the period of earthquake activity (~12/1/13), the injection pressure increases without a clear increase in injection volume implying decreasing compressibility in the injection reservoir during the period of earthquake activity. Injector Well #1 owners provide average daily injection pressures and volumes below (Supplementary Figure 7).

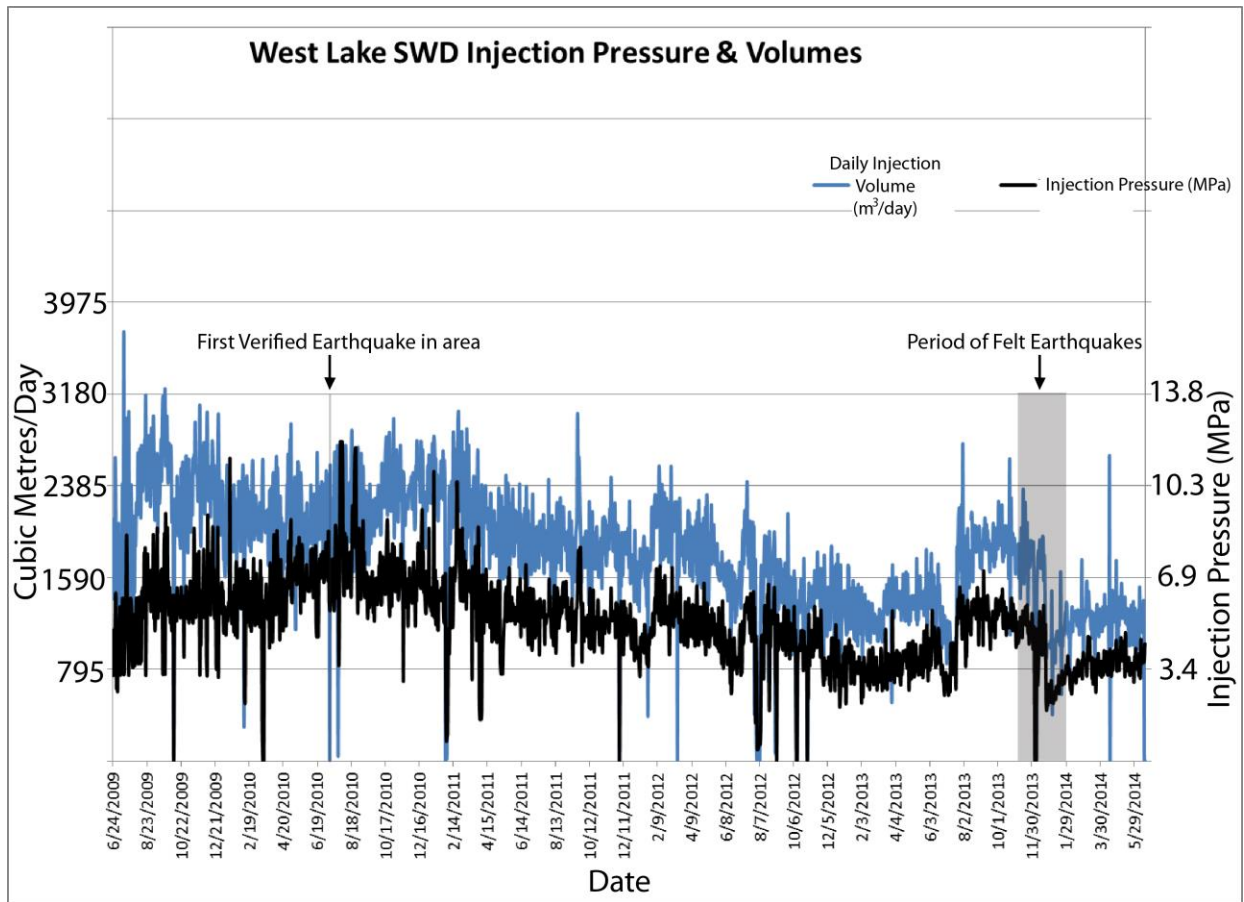

**Supplementary Figure 7.** Average daily injection pressures for Injector Well #1 since the start of injection provided by XTO Energy Inc. and now available through the TRC. Although a pressure increase occurs in late 2013, three months before felt earthquake activity begins, it is also clear that injection well pressures and volumes were significantly higher during the 2009-2011 period when only one recorded earthquake was reported by a temporary seismic network was placed in the region from November 2009 to September 2011<sup>17</sup>. Data provided courtesy of XTO Energy Inc.

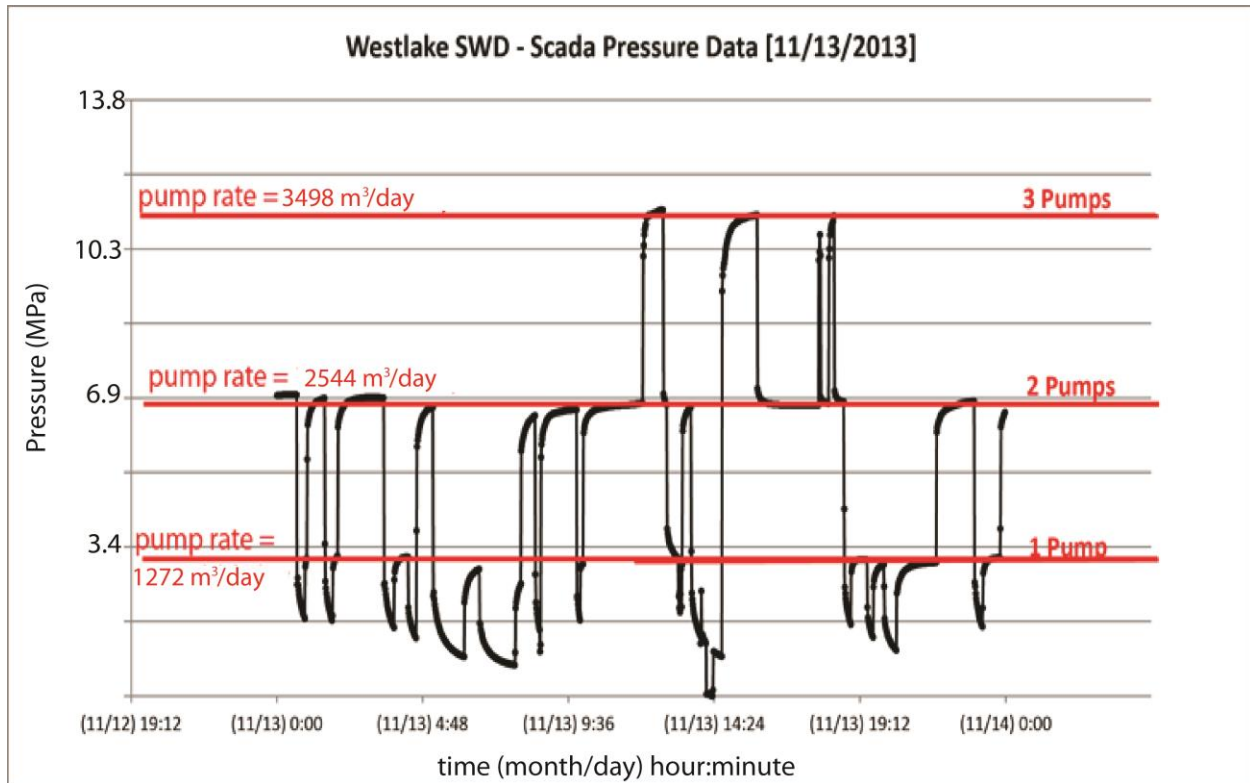

**Supplementary Figure 8.** Measured wellhead pressures at Injector Well #1 for time periods where different pump rates and periods of no pumping occurred. We use these data to place constraints on permeability in the Ellenburger near Injector Well #1. During periods when all injection pumps are off, wellhead pressure exponentially decays. Industry researchers indicate that during periods of sustained shutdown (several days) well head pressures converge to ~0.5 MPa. Data provided courtesy of XTO Energy Inc.



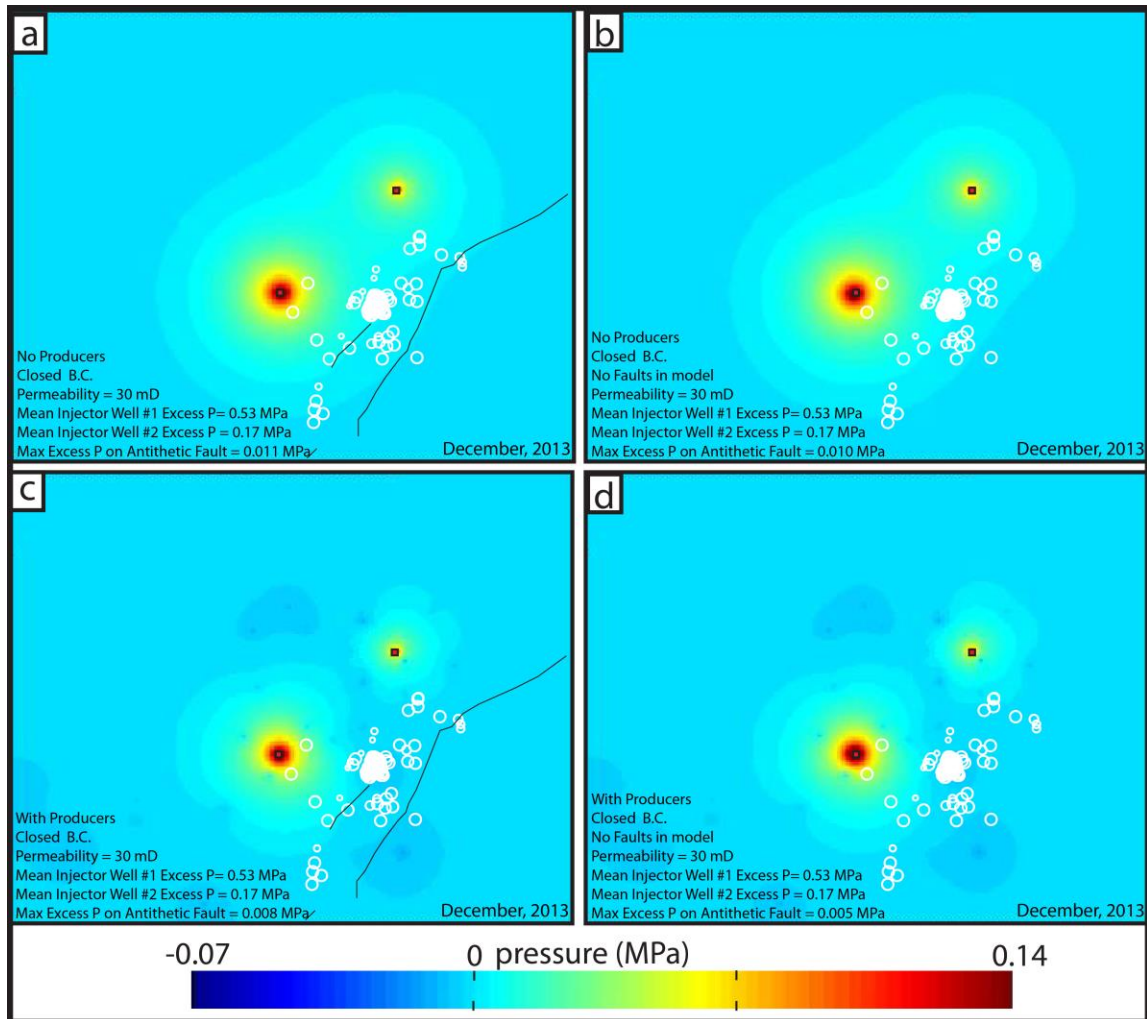

**Supplementary Figure 9.** Estimate for excess pressure in the Ellenburger, December 2013, based on model results assuming average pressures of 0.57 MPa and 0.17 MPa exist at Injector Well #1 and Injector Well #2, respectively. These injection pressures are low end-member estimates. For all models, the Ellenburger is 1000 m thick. **(a)** only brine injection occurs; **(b)** only brine injection occurs and no subsurface faults exist; **(c)** brine injection and water production occur, and **(d)** brine injection and water production occur and no faults exist. The existence of faults and no production wells results in the largest pressure development at earthquake locations. The scenario with no faults and brine production results in the lowest pressure development in the area of earthquake locations. Even for the lowest pressure case, model-predicted pressure is still ~1 order of magnitude higher than the expected pressure changes caused by lake level and ground water changes near the surface.

## Supplementary Table 1:

### Seismic Station information

| Station | Network | Ondate*     | Offdate*    | Latitude          | Longitude    | Elevation (km) | Instrument                                      | Sample Rate (samples per second) |
|---------|---------|-------------|-------------|-------------------|--------------|----------------|-------------------------------------------------|----------------------------------|
| AZCT    | NQ      | 201334<br>8 | 201400<br>7 | 32.910<br>3       | -<br>97.5617 | 0.223          | GeoSIG GMS-IA18 NetQuakes                       | 200                              |
| AZEP    | NQ      | 201400<br>7 | -           | 32.963<br>4       | -<br>97.5354 | 0.224          | GeoSIG GMS-IA18 NetQuakes                       | 200                              |
| AZFS    | NQ      | 201334<br>6 | 201335<br>8 | 32.889<br>1       | -<br>97.5291 | 0.135          | GeoSIG GMS-IA18 NetQuakes                       | 200                              |
| AZHS    | NQ      | 201334<br>8 | -           | 32.929<br>7       | -<br>97.5397 | 0.219          | GeoSIG GMS-IA18 NetQuakes                       | 200                              |
| AZNH    | NQ      | 201335<br>8 | -           | 32.989<br>97.5904 | -            | 0.273          | GeoSIG GMS-IA18 NetQuakes                       | 200                              |
| AZCF    | ZW      | 201403<br>0 | -           | 33.184<br>1       | -<br>97.4463 | 0.381          | Guralp CMG3T_120sec/Guralp DM24 Datalogger      | 100                              |
| AZDA    | ZW      | 201400<br>8 | -           | 32.972<br>8       | -<br>97.5553 | 0.238          | Mark Products L28/Reftek 130 Datalogger         | 100                              |
| AZDA    | ZW      | 201400<br>8 | -           | 32.972<br>8       | -<br>97.5553 | 0.238          | Chapparral 2.5 microphone/Reftek 130 Datalogger | 40/200                           |
| AZDA    | ZW      | 201400<br>8 | -           | 32.972<br>8       | -<br>97.5553 | 0.238          | Mark Products L4C/Reftek 130 Datalogger         | 100/200                          |
| AZHL    | ZW      | 201401<br>1 | -           | 32.965<br>6       | -<br>97.3483 | 0.222          | Guralp CMG3T_120sec/Guralp DM24 Datalogger      | 100                              |
| AZLE    | ZW      | 201401<br>1 | -           | 32.982<br>4       | -<br>97.7862 | 0.381          | Guralp CMG3T_120sec/Guralp DM24 Datalogger      | 100                              |
| AZWP    | ZW      | 201401<br>5 | -           | 32.779<br>5       | -97.66       | 0.381          | Guralp CMG3T_120sec/Guralp DM24 Datalogger      | 100                              |
| AZWR    | ZW      | 201402<br>8 | -           | 32.811<br>5       | -98.312      | 0.381          | Guralp CMG3T_120sec/Guralp DM24 Datalogger      | 100                              |
| BRRD    | NQ      | 201335<br>4 | -           | 32.994<br>8       | -<br>97.5379 | 0.223          | GeoSIG GMS-IA18 NetQuakes                       | 200                              |
| EML1    | ZW      | 201334<br>8 | -           | 32.873<br>5       | -<br>97.4603 | 0.211          | Sprengnether S6000/Reftek 130 Datalogger        | 100                              |
| RESD    | NQ      | 201334<br>8 | -           | 32.941<br>9       | -<br>97.5786 | 0.223          | GeoSIG GMS-IA18 NetQuakes                       | 200                              |

\*Ondate and Offdate in YearJulianDay

**Supplementary Table 2:**

**Local P-wave (VP) and S-wave (VS) Velocity Model Used to Relocate Earthquakes Near Azle, Texas.**

| Depth BSL (km)* | Depth Surface (km) | VP<br>(km s <sup>-1</sup> ) | VS<br>(km s <sup>-1</sup> ) | VP/VS |
|-----------------|--------------------|-----------------------------|-----------------------------|-------|
| -0.235          | 0.000              | 2.75                        | 1.53                        | 1.8   |
| 0.135           | 0.370              | 3.70                        | 2.05                        | 1.8   |
| 0.565           | 0.800              | 4.00                        | 2.22                        | 1.8   |
| 1.465           | 1.700              | 4.35                        | 2.44                        | 1.8   |
| 1.865           | 2.100              | 6.00                        | 3.37                        | 1.8   |

### Supplementary Table 3:

### Monthly Injection Rates for Injection Well #1

| Time<br>(month-year) | m <sup>3</sup> per<br>month |
|----------------------|-----------------------------|
| Jun-09               | 18135                       |
| Jul-09               | 43451                       |
| Aug-09               | 58222                       |
| Sep-09               | 60730                       |
| Oct-09               | 51254                       |
| Nov-09               | 55239                       |
| Dec-09               | 57047                       |
| Jan-10               | 50566                       |
| Feb-10               | 44490                       |
| Mar-10               | 49979                       |
| Apr-10               | 46830                       |
| May-10               | 50399                       |
| Jun-10               | 47146                       |
| Jul-10               | 48299                       |
| Aug-10               | 52117                       |
| Sep-10               | 48041                       |
| Oct-10               | 54769                       |
| Nov-10               | 52380                       |
| Dec-10               | 54903                       |
| Jan-11               | 57145                       |
| Feb-11               | 41982                       |
| Mar-11               | 52118                       |
| Apr-11               | 45664                       |
| May-11               | 46272                       |
| Jun-11               | 44180                       |
| Jul-11               | 43758                       |
| Aug-11               | 43391                       |
| Sep-11               | 44397                       |

|              |                |
|--------------|----------------|
| Oct-11       | 41548          |
| Nov-11       | 43401          |
| Dec-11       | 41127          |
| Jan-12       | 38728          |
| Feb-12       | 45290          |
| Mar-12       | 46196          |
| Apr-12       | 42636          |
| May-12       | 42186          |
| Jun-12       | 33910          |
| Jul-12       | 39147          |
| Aug-12       | 28259          |
| Sep-12       | 33347          |
| Oct-12       | 29015          |
| Nov-12       | 30802          |
| Dec-12       | 31106          |
| Jan-13       | 30343          |
| Feb-13       | 25720          |
| Mar-13       | 31080          |
| Apr-13       | 30640          |
| May-13       | 31295          |
| Jun-13       | 31927          |
| Jul-13       | 30170          |
| Aug-13       | 42264          |
| Sep-13       | 41987          |
| <b>Total</b> | <b>2225028</b> |
| <b>Mean</b>  | <b>43628</b>   |

**Supplementary Table 4:****Monthly injection rates and average wellhead pressure rates for Injector Well #2.**

| Time<br>(month-year) | Av. Monthly<br>Pressure (MPa) | Volume<br>(m <sup>3</sup> per month) |
|----------------------|-------------------------------|--------------------------------------|
| Oct-10               | 3.4                           | 14194                                |
| Nov-10               | 4.2                           | 15207                                |
| Dec-10               | 3.7                           | 13746                                |
| Jan-11               | 3.4                           | 12580                                |
| Feb-11               | 2.5                           | 10419                                |
| Mar-11               | 2.9                           | 12123                                |
| Apr-11               | 3.2                           | 12136                                |
| May-11               | 2.5                           | 11658                                |
| Jun-11               | 2.7                           | 10427                                |
| Jul-11               | 3.6                           | 11888                                |
| Aug-11               | 3.1                           | 11223                                |
| Sep-11               | 3.5                           | 12488                                |
| Oct-11               | 3.8                           | 12647                                |
| Nov-11               | 2.6                           | 10778                                |
| Dec-11               | 3.1                           | 12378                                |
| Jan-12               | 3.4                           | 13294                                |
| Feb-12               | 2.7                           | 10649                                |
| Mar-12               | 3.1                           | 10870                                |
| Apr-12               | 3.6                           | 12116                                |
| May-12               | 3.7                           | 12153                                |
| Jun-12               | 4.5                           | 16055                                |
| Jul-12               | 3.6                           | 16875                                |
| Aug-12               | 4.2                           | 16264                                |
| Sep-12               | 4.7                           | 15381                                |

|              |     |               |
|--------------|-----|---------------|
| Oct-12       | 4.8 | 15843         |
| Nov-12       | 3.9 | 15010         |
| Dec-12       | 4.1 | 16784         |
| Jan-13       | 4.4 | 15710         |
| Feb-13       | 3.4 | 13220         |
| Mar-13       | 5.0 | 18584         |
| Apr-13       | 4.3 | 14582         |
| May-13       | 2.9 | 10342         |
| Jun-13       | 3.0 | 9603          |
| Jul-13       | 2.9 | 9918          |
| Aug-13       | 3.1 | 9792          |
| Sep-13       | 2.8 | 9275          |
| <b>Total</b> |     | <b>466213</b> |

**Supplementary Table 5:**

Production well number (American Petroleum Institute “API” number), location, and start date for the 70 largest brine-producing production wells in the earthquake area based on G-10 TRC reports. All G-10 data can be found through the TRC.

| API      | Latitude  | Longitude | Mean Monthly brine production (m <sup>3</sup> per month) | Start Date  |
|----------|-----------|-----------|----------------------------------------------------------|-------------|
| 43932613 | 32.97092  | -97.5304  | 2770                                                     | Oct. 2008   |
| 36735205 | 32.9562   | -97.5898  | 1297                                                     | Jan. 2012   |
| 43932605 | 32.97099  | -97.534   | 1161                                                     | Oct. 2008   |
| 43935738 | 32.94141  | -97.5267  | 1116                                                     | Sept. 2011  |
| 36733989 | 32.985277 | -97.54019 | 980                                                      | Oct. 2006   |
| 36734139 | 32.96381  | -97.5476  | 683                                                      | Nov. 2006   |
| 49736104 | 33.00734  | -97.5091  | 539                                                      | Nov. 2006   |
| 43935807 | 32.94141  | -97.5267  | 533                                                      | Aug. 2011   |
| 36734349 | 32.95557  | -97.5635  | 522                                                      | May, 2007   |
| 43934469 | 32.94124  | -97.5285  | 467                                                      | Mar. 2010   |
| 36733762 | 32.95958  | -97.5795  | 448                                                      | June, 2006  |
| 43931502 | 32.98667  | -97.5378  | 446                                                      | Aug. 2006   |
| 43935733 | 32.94322  | -97.5296  | 417                                                      | July, 2011  |
| 36733709 | 32.956184 | -97.55569 | 385                                                      | Sept. 2005  |
| 36734045 | 32.97524  | -97.5528  | 370                                                      | Oct. 2006   |
| 43935846 | 32.9418   | -97.5257  | 368                                                      | Aug. 2011   |
| 43931850 | 32.96596  | -97.5179  | 337                                                      | Aug. 2007   |
| 36734070 | 32.984983 | -97.55416 | 329                                                      | Sept. 2006  |
| 49736435 | 33.00393  | -97.518   | 306                                                      | July, 2008  |
| 36735272 | 32.97873  | -97.5967  | 304                                                      | Aug. 2012   |
| 43934619 | 32.97791  | -97.5163  | 295                                                      | April, 2010 |
| 36735271 | 32.97589  | -97.5969  | 290                                                      | Jan, 2013   |
| 49736433 | 33.00537  | -97.52    | 290                                                      | July, 2008  |
| 36734715 | 32.96238  | -97.5367  | 284                                                      | Nov. 2008   |
| 36733868 | 32.9659   | -97.5367  | 281                                                      | Mar. 2006   |
| 43932449 | 32.95082  | -97.5247  | 279                                                      | Oct. 2007   |
| 43936094 | 32.96507  | -97.5201  | 279                                                      | Feb. 2012   |



|          |           |           |     |             |
|----------|-----------|-----------|-----|-------------|
| 43931961 | 32.98087  | -97.53    | 265 | Aug. 2007   |
| 49736119 | 33.00978  | -97.512   | 240 | Jan. 2007   |
| 43931868 | 32.95649  | -97.5107  | 235 | Dec. 2007   |
| 43935732 | 32.94303  | -97.5304  | 214 | Sept. 2011  |
| 43933173 | 32.98303  | -97.529   | 200 | June, 2008  |
| 36734395 | 32.965689 | -97.5912  | 195 | July, 2007  |
| 43931370 | 32.93891  | -97.5272  | 188 | Mar. 2006   |
| 36733927 | 32.96827  | -97.5723  | 180 | July, 2006  |
| 36734714 | 32.96513  | -97.538   | 175 | Nov. 2008   |
| 49736184 | 33.01524  | -97.5265  | 162 | Feb. 2007   |
| 43934202 | 32.94977  | -97.5199  | 162 | Dec. 2009   |
| 49736702 | 33.00213  | -97.5206  | 154 | Jan. 2009   |
| 43931807 | 32.96871  | -97.53    | 152 | Sept. 2007  |
| 43934611 | 32.99339  | -97.536   | 149 | Aug. 2010   |
| 43931809 | 32.96862  | -97.5346  | 140 | April, 2007 |
| 43934088 | 32.95259  | -97.515   | 137 | Dec. 2009   |
| 43934486 | 32.97809  | -97.5189  | 137 | June, 2010  |
| 43936082 | 32.96678  | -97.5139  | 129 | Mar. 2012   |
| 36733734 | 32.99323  | -97.5419  | 128 | Nov. 2005   |
| 36735139 | 32.96571  | -97.5367  | 125 | Sept. 2011  |
| 36734972 | 32.956926 | -97.54423 | 119 | Sept. 2009  |
| 49735655 | 33.00013  | -97.5153  | 116 | Jan. 2005   |
| 36734249 | 32.982997 | -97.58554 | 118 | Feb.2008    |
| 43936073 | 32.97837  | -97.5208  | 109 | Feb. 2012   |
| 36733979 | 32.94865  | -97.5766  | 104 | July, 2006  |
| 36735138 | 32.96393  | -97.5368  | 94  | Sept. 2011  |
| 43931700 | 32.95886  | -97.5344  | 94  | April, 2007 |
| 43931357 | 32.95098  | -97.5124  | 92  | Feb.2006    |
| 49736415 | 32.99882  | -97.5291  | 91  | Feb.2008    |
| 36733925 | 32.93989  | -97.5461  | 91  | Sept. 2006  |
| 49737176 | 33.00028  | -97.5877  | 91  | July, 2011  |
| 43934499 | 32.95176  | -97.5464  | 76  | June, 2010  |
| 36734628 | 32.95899  | -97.5415  | 75  | Dec. 2008   |

|          |          |          |    |             |
|----------|----------|----------|----|-------------|
| 43934368 | 32.96245 | -97.5239 | 75 | Mar. 2012   |
| 36733879 | 32.95753 | -97.5416 | 73 | Sept. 2006  |
| 36734744 | 32.97401 | -97.5794 | 72 | Nov. 2008   |
| 43933657 | 32.97287 | -97.5246 | 71 | Dec. 2008   |
| 49736416 | 33.00748 | -97.5685 | 71 | April, 2008 |
| 43936121 | 32.96645 | -97.5125 | 71 | Mar. 2012   |
| 36734471 | 32.95423 | -97.5564 | 69 | Nov. 2007   |
| 36735080 | 32.95368 | -97.5456 | 65 | Dec. 2010   |
| 43936232 | 32.94811 | -97.5462 | 63 | April, 2012 |
| 49736003 | 32.99729 | -97.5296 | 63 | July, 2006  |
